# Supplementary material
Source: PubMed Central journal article supplement (PMC1369147)
Supplement: 6-7400480-s1.pdf [file 6-7400480-s1.pdf]

| <b>Protein (accession number)</b>           | <b><math>\Phi/\Psi</math>/RRXR</b> | <b>Topology</b> | <b>Comments</b>         | <b>Reference</b>                      |
|---------------------------------------------|------------------------------------|-----------------|-------------------------|---------------------------------------|
| Invariant chain Iip35(P04233)               | <b>RRSR</b>                        | II              | +                       | Schutze et al, EMBO J, 1994           |
| Kir6.2 (P70673)                             | <b>LRRR</b>                        | P(C)            | +                       | Zerangue et al, Neuron, 1999          |
| Kir6.1(Q63664)                              | <b>LRRR</b>                        | P(C)            | +                       | Zerangue et al, Neuron, 1999          |
| SUR1(A56248)                                | <b>NRKR</b>                        | P(L)            | +                       | Zerangue et al, Neuron, 1999          |
| SUR2 (NP_037172)                            | <b>NRKQ</b>                        | P(L)            | +, weak                 | Konstas et al, JBC, 2002              |
| EBV gp110 (CAD53463)                        | <b>LRRR</b>                        | I               | +, inm                  | Lee Virology, 1999                    |
| GABA <sub>B</sub> receptor 1(Q9Z0U4)        | <b>LRSR</b>                        | P(C)            | +                       | Margeta-Mitrovic et al, Neuron, 2000  |
| NMDA receptor subunit NR1 (Q05586)          | <b>KRRR</b>                        | P(C)            | +                       | Standley et al, Neuron, 2000          |
| mGluR1 (NP_000829)                          | <b>FRRK</b>                        | P(C)            | +                       | Chan et al, Mol Cell Neurosci, 2001   |
| HCMV gB (P06473)                            | <b>LRHR</b>                        | I               | +, inm                  | Meyer et al, JBC, 2000                |
| HSV1 gB (P06437)                            | <b>MRKR</b>                        | I               | +, inm                  | Meyer et al, BBRC, 2002               |
| KA2 (NP_113696)                             | <b>RRRR</b>                        | P(C)            | +                       | Ren et al, J Neurosci, 2003           |
| KA1 (Q16099)                                | <b>RRRR</b>                        | P(C)            | +                       | Ren et al, J Neurosci, 2003           |
| VIPL (Q9H0V9)                               | <b>SRKRFY-</b><br>COOH             | I               | +, but see *            | Nufer et al, JBC, 2003                |
| 5-hydroxytryptamine receptor 3B (NP_006019) | <b>CRAR</b>                        | P(L)            | Problematic, see **     | Boyd et al, JBC, 2003                 |
| Kv4.2 (NP_036413)                           | <b>ERKR</b>                        | P(N)            | -                       | Shibata et al, JBC, 2003              |
| Glucosidase I (CAD19636)                    | <b>RRRR</b>                        | II              | +                       | Hardt et al, Glycobiology, 2003       |
| GLT-1 (P43006)                              | <b>DRMR</b>                        | P(EL)           | Extracellular!          | Kalandadze et al, J Neurosci, 2004    |
| hGGA1 (O43292)                              | <b>VRRR</b>                        | P(N)            | -                       | Vainauskas et al, JBC, 2005           |
| V2 vasopressin receptor (P30518)            | <b>RRGR</b>                        | P(L)            | Exposed upon truncation | Hermosilla et al, Mol Pharmacol, 2001 |

Table I: Selected examples of R-based signals. These motifs were investigated in the context of the respective protein and in many cases on reporter proteins as well. Topology is indicated as type I, type II, or P (polytopic). Position of R-based signal in the N-terminus (N), cytosolic loop (L), extracellular loop (EL), or C-terminus (C) is indicated. + or - indicate functionality of the signal. inm = inner nuclear membrane.

\* Whilst functional, this signal is very difficult to distinguish from a -KKXX type signal as there is one K present, the spacing is correct with respect to the distal C-terminus and the signal is spaced fairly close to the transmembrane segment.

\*\* This signal does not comply with the consensus at all and is located in a very short cytosolic loop. There are no reporter protein experiments to support the function of this motif as a peptide sorting signal.

## References

- Boyd GW, Doward AI, Kirkness EF, Millar NS & Connolly CN (2003) Cell surface expression of 5-hydroxytryptamine type 3 receptors is controlled by an endoplasmic reticulum retention signal. *J Biol Chem* **278**: 27681-27687
- Chan WY, Soloviev MM, Ciruela F & McIlhinney RA (2001) Molecular determinants of metabotropic glutamate receptor 1B trafficking. *Mol Cell Neurosci* **17**: 577-588
- Hardt B, Kalz-Fuller B, Aparicio R, Volker C & Bause E (2003) (Arg)<sup>3</sup> within the N-terminal domain of glucosidase I contains ER targeting information but is not required absolutely for ER localization. *Glycobiology* **13**: 159-168
- Hermosilla R & Schulein R (2001) Sorting functions of the individual cytoplasmic domains of the G protein-coupled vasopressin V(2) receptor in Madin Darby canine kidney epithelial cells. *Mol Pharmacol* **60**: 1031-1039
- Kalandadze A, Wu Y, Fournier K & Robinson MB (2004) Identification of motifs involved in endoplasmic reticulum retention-forward trafficking of the GLT-1 subtype of glutamate transporter. *J Neurosci* **24**: 5183-5192
- Konstas AA, Dabrowski M, Korbmacher C & Tucker SJ (2002) Intrinsic sensitivity of Kir1.1 (ROMK) to glibenclamide in the absence of SUR2B. Implications for the identity of the renal ATP-regulated secretory K<sup>+</sup> channel. *J Biol Chem* **277**: 21346-21351
- Lee SK (1999) Four consecutive arginine residues at positions 836-839 of EBV gp110 determine intracellular localization of gp110. *Virology* **264**: 350-358
- Margeta-Mitrovic M, Jan YN & Jan LY (2000) A trafficking checkpoint controls GABA(B) receptor heterodimerization. *Neuron* **27**: 97-106
- Meyer G, Gicklhorn D, Strive T, Radsak K & Eickmann M (2002) A three-residue signal confers localization of a reporter protein in the inner nuclear membrane. *Biochem Biophys Res Commun* **291**: 966-971

- Meyer GA & Radsak KD (2000) Identification of a novel signal sequence that targets transmembrane proteins to the nuclear envelope inner membrane. *J Biol Chem* **275**: 3857-3866
- Nufer O, Mitrovic S & Hauri HP (2003) Profile-based data base scanning for animal L-type lectins and characterization of VIPL, a novel VIP36-like endoplasmic reticulum protein. *J Biol Chem* **278**: 15886-15896
- Ren Z, Riley NJ, Garcia EP, Sanders JM, Swanson GT & Marshall J (2003) Multiple trafficking signals regulate kainate receptor KA2 subunit surface expression. *J Neurosci* **23**: 6608-6616
- Schutze MP, Peterson PA & Jackson MR (1994) An N-terminal double-arginine motif maintains type II membrane proteins in the endoplasmic reticulum. *EMBO J* **13**: 1696-1705
- Shibata R, Misonou H, Campomanes CR, Anderson AE, Schrader LA, Doliveira LC, Carroll KI, Sweatt JD, Rhodes KJ & Trimmer JS (2003) A fundamental role for KChIPs in determining the molecular properties and trafficking of Kv4.2 potassium channels. *J Biol Chem* **278**: 36445-36454
- Standley S, Roche KW, McCallum J, Sans N & Wenthold RJ (2000) PDZ domain suppression of an ER retention signal in NMDA receptor NR1 splice variants. *Neuron* **28**: 887-898
- Vainauskas S & Menon AK (2005) Endoplasmic reticulum localization of Gaa1 and PIG-T, subunits of the glycosylphosphatidylinositol (GPI) transamidase complex. *J Biol Chem*
- Zerangue N, Schwappach B, Jan YN & Jan LY (1999) A new ER trafficking signal regulates the subunit stoichiometry of plasma membrane K(ATP) channels. *Neuron* **22**: 537-548
